# Supplementary material for: Social Causation Versus Health Selection in the Life Course: Does Their Relative Importance Differ by Dimension of SES?
Source: Springer Nature journal article supplement (doi:10.1007/s11205-018-1871-x), 2018-03-13

Hoffmann, Rasmus; Kröger, Hannes; Geyer, Siegfried

**Article — Published Version**

## Social Causation Versus Health Selection in the Life Course: Does Their Relative Importance Differ by Dimension of SES?

Social Indicators Research

**Provided in Cooperation with:**

German Institute for Economic Research (DIW Berlin)

*Suggested Citation:* Hoffmann, Rasmus; Kröger, Hannes; Geyer, Siegfried (2019) : Social Causation Versus Health Selection in the Life Course: Does Their Relative Importance Differ by Dimension of SES?, Social Indicators Research, ISSN 1573-0921, Springer, Heidelberg, Vol. 141, Iss. 3, pp. 1341-1367, <https://doi.org/10.1007/s11205-018-1871-x>

This Version is available at:

<https://hdl.handle.net/10419/200211>

**Standard-Nutzungsbedingungen:**

Die Dokumente auf EconStor dürfen zu eigenen wissenschaftlichen Zwecken und zum Privatgebrauch gespeichert und kopiert werden.

Sie dürfen die Dokumente nicht für öffentliche oder kommerzielle Zwecke vervielfältigen, öffentlich ausstellen, öffentlich zugänglich machen, vertreiben oder anderweitig nutzen.

Sofern die Verfasser die Dokumente unter Open-Content-Lizenzen (insbesondere CC-Lizenzen) zur Verfügung gestellt haben sollten, gelten abweichend von diesen Nutzungsbedingungen die in der dort genannten Lizenz gewährten Nutzungsrechte.

**Terms of use:**

*Documents in EconStor may be saved and copied for your personal and scholarly purposes.*

*You are not to copy documents for public or commercial purposes, to exhibit the documents publicly, to make them publicly available on the internet, or to distribute or otherwise use the documents in public.*

*If the documents have been made available under an Open Content Licence (especially Creative Commons Licences), you may exercise further usage rights as specified in the indicated licence.*

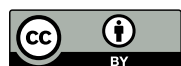

<http://creativecommons.org/licenses/by/4.0/>

### Phase 1

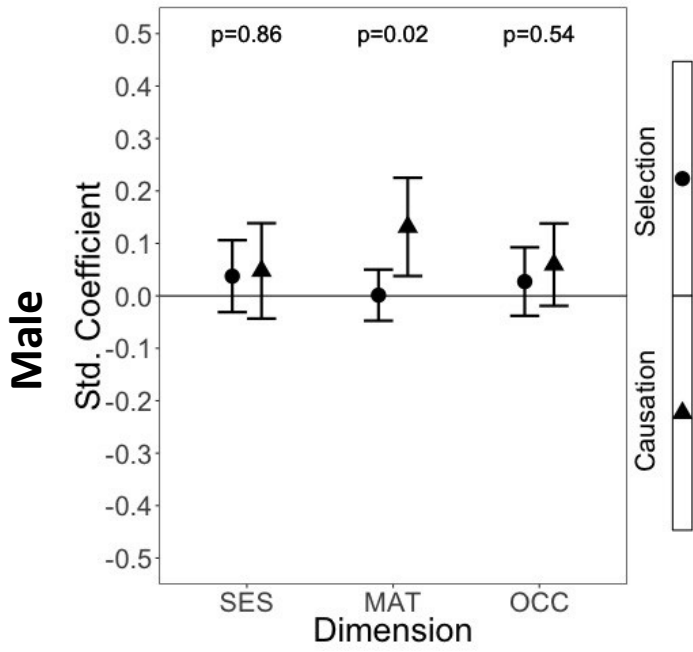

### Phase 2

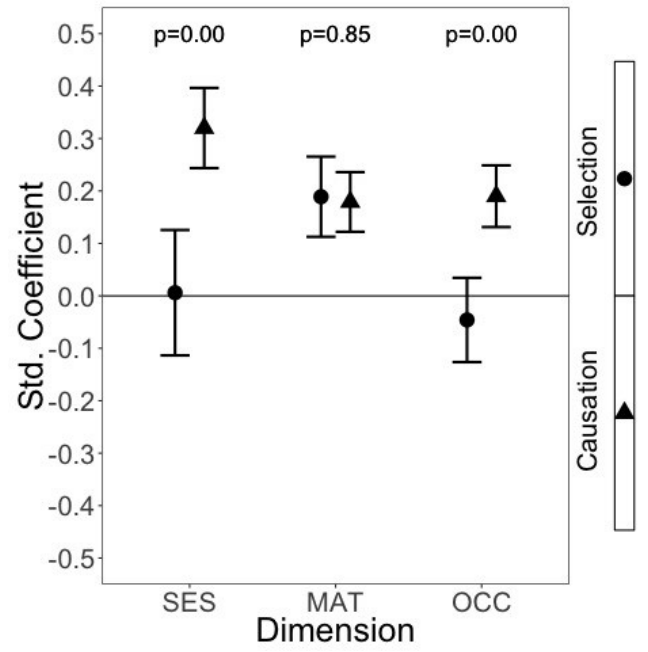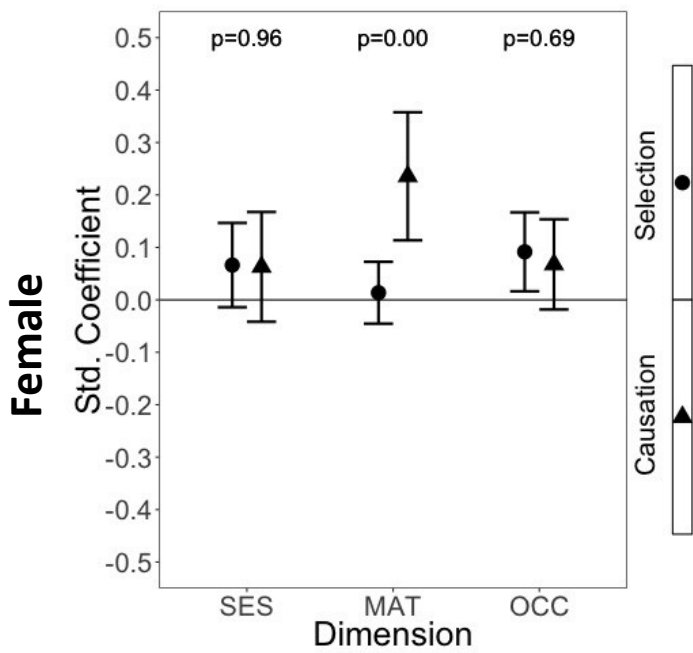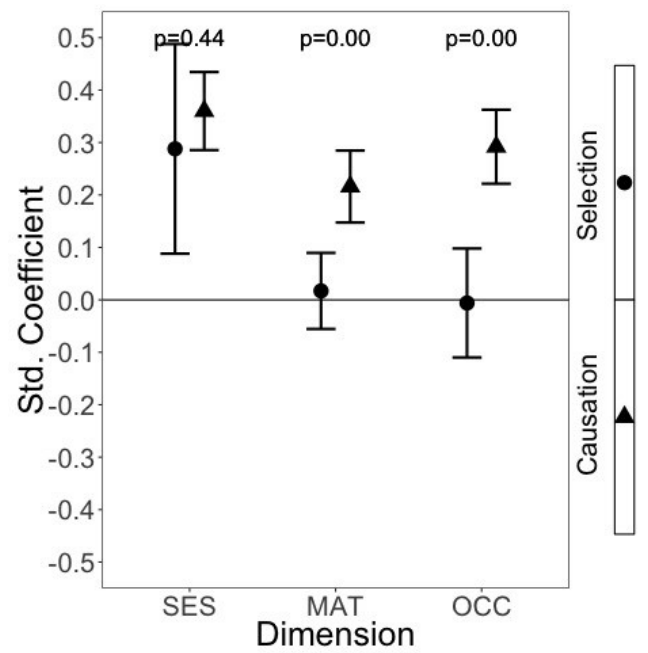

Supplement: MOESM4 [file 11205_2018_1871_MOESM4_ESM.pdf]
